# Supplementary material for: Adverse Outcomes of Patients with Non-Ventilator-Associated Hospital-Acquired Pneumonia (nvHAP)—A Single Centre Cohort Study
Source: MDPI journal article supplement (doi:10.3390/idr16020018), 2024-03-13
Supplement: s1 [file s1]

**Supplementary Table 1: Potential risk factors for adverse events including definitions**

| <b>Terms</b>                                        | <b>Definitions</b>                                                                                                                                                                                                                                                                                                                                                                                                                                                                                                                                                                                                                                                                                                                                                                                                                                                                                                                         |
|-----------------------------------------------------|--------------------------------------------------------------------------------------------------------------------------------------------------------------------------------------------------------------------------------------------------------------------------------------------------------------------------------------------------------------------------------------------------------------------------------------------------------------------------------------------------------------------------------------------------------------------------------------------------------------------------------------------------------------------------------------------------------------------------------------------------------------------------------------------------------------------------------------------------------------------------------------------------------------------------------------------|
| Age                                                 | In years on admission                                                                                                                                                                                                                                                                                                                                                                                                                                                                                                                                                                                                                                                                                                                                                                                                                                                                                                                      |
| Sex                                                 | Male or female                                                                                                                                                                                                                                                                                                                                                                                                                                                                                                                                                                                                                                                                                                                                                                                                                                                                                                                             |
| Body mass index (BMI)                               | In kg/m <sup>2</sup>                                                                                                                                                                                                                                                                                                                                                                                                                                                                                                                                                                                                                                                                                                                                                                                                                                                                                                                       |
| Affiliation to department                           | Affiliation to surgical or non-surgical department 48hours before onset of nvHAP symptoms<br>Surgical departments were: department of obstetrics, department of gynaecology, department of cardiac and vascular surgery, department of neurosurgery, department of otorhinolaryngology, department of plastic and hand surgery, department of thoracic surgery, department of orthopaedics and trauma surgery, department of urology, department of visceral surgery<br>Non-surgical departments were: dermatology, department of endocrinology, diabetology and clinical nutrition, department of gastroenterology and hepatology, geriatrics, department of haematology, department of infectious diseases, department of cardiology, department of internal medicine, department of nephrology, department of neurology, department of oncology, department of pneumology, department of radiation oncology, department of rheumatology |
| Bacterial pneumonia                                 | Detection of causal bacterial pathogen either respiratory samples or blood cultures. Detection of bacterial antigen in urine.<br>Detection of oral flora in upper respiratory cultures or of skin commensals in blood cultures did not fulfil the definition of a causal bacterium                                                                                                                                                                                                                                                                                                                                                                                                                                                                                                                                                                                                                                                         |
| Viral pneumonia                                     | Detection of viral pathogen in respiratory sample. .                                                                                                                                                                                                                                                                                                                                                                                                                                                                                                                                                                                                                                                                                                                                                                                                                                                                                       |
| Fungal pneumonia                                    | Meeting criteria of a “probable invasive fungal disease” according to EORTC/MSG criteria [1,2].                                                                                                                                                                                                                                                                                                                                                                                                                                                                                                                                                                                                                                                                                                                                                                                                                                            |
| Sepsis                                              | qSOFA (quick sequential organ failure assessment) score of $\geq 2$ [3].                                                                                                                                                                                                                                                                                                                                                                                                                                                                                                                                                                                                                                                                                                                                                                                                                                                                   |
| ARDS                                                | Diagnosis according to the treating physician’s discretion from discharge medical documents                                                                                                                                                                                                                                                                                                                                                                                                                                                                                                                                                                                                                                                                                                                                                                                                                                                |
| Empyema                                             | Collection of pus in a pre-existing tissue cavity.                                                                                                                                                                                                                                                                                                                                                                                                                                                                                                                                                                                                                                                                                                                                                                                                                                                                                         |
| Charlson comorbidity index and the elements thereof | See Additional file 2 [4-6].                                                                                                                                                                                                                                                                                                                                                                                                                                                                                                                                                                                                                                                                                                                                                                                                                                                                                                               |
| Infection with MDRO                                 | MRDO detected in the smear, causes the disease.                                                                                                                                                                                                                                                                                                                                                                                                                                                                                                                                                                                                                                                                                                                                                                                                                                                                                            |
| Haemoglobin on admission                            | Haemoglobin in g/L on admission day +/- 2 days                                                                                                                                                                                                                                                                                                                                                                                                                                                                                                                                                                                                                                                                                                                                                                                                                                                                                             |
| Albumin on admission                                | Albumin in g/l on admission day +/- 2 days                                                                                                                                                                                                                                                                                                                                                                                                                                                                                                                                                                                                                                                                                                                                                                                                                                                                                                 |
| Urea on admission                                   | Urea in mmol/l on admission day +/- 2 days                                                                                                                                                                                                                                                                                                                                                                                                                                                                                                                                                                                                                                                                                                                                                                                                                                                                                                 |
| C-reactive protein (CRP) peak                       | Highest CRP in mg/l 0-3 days after nvHAP diagnosis                                                                                                                                                                                                                                                                                                                                                                                                                                                                                                                                                                                                                                                                                                                                                                                                                                                                                         |

**Abbreviations:** ARDS, acute respiratory distress syndrome; BMI, body mass index; CRP, c-reactive protein; eGFR, estimated glomerular filtration rate; g/L, gram per litre; G/L, giga per litre; Hb, Haemoglobin; ICU, intensive care unit; mmol/L, millimole per litre; ml/min, millilitre per minute; mg/l, milligram per litre; MRDO, multidrug resistant organism; nvHAP, non-ventilator associated pneumonia; qSOFA, quick sequential organ failure assessment score.

**Supplementary Table 2: Charlson comorbidity index [4]**

| Comorbidity                                 | Explanations                                                                                                                            | Points |
|---------------------------------------------|-----------------------------------------------------------------------------------------------------------------------------------------|--------|
| Myocardial infarct                          | History of myocardial infarct                                                                                                           | 1      |
| Congestive heart failure                    | Symptomatic with response to specific treatment                                                                                         | 1      |
| Peripheral vascular disease                 | Intermittent claudication, peripheral arterial bypass, gangrene, acute arterial insufficiency, untreated aneurysm ( $\geq 6\text{cm}$ ) | 1      |
| Cerebrovascular disease (Except hemiplegia) | Incl. History of transient ischemic attack                                                                                              | 1      |
| Dementia                                    |                                                                                                                                         | 1      |
| Chronic pulmonary disease                   | Including Asthma                                                                                                                        | 1      |
| Ulcer disease                               |                                                                                                                                         | 1      |
| Mild liver disease                          | Cirrhosis without portal hypertension                                                                                                   | 1      |
| Diabetes (without complication)             |                                                                                                                                         | 1      |
| Diabetes (with end organ damage)            | Retinopathy, neuropathy, nephropathy                                                                                                    | 2      |
| Hemiplegia                                  | Incl. Paraplegia                                                                                                                        | 2      |
| Moderate or severe renal disease            | Creatinine $> 3\text{mg/dl}$ ( $265\text{ }\mu\text{mol/l}$ ), dialysis, transplantation, uremic syndrome                               | 2      |
| 2nd solid tumour (not metastatic)           | Initially treated in the last 5 years. Exclude non-melanomatous skin cancer and in situ cervical carcinoma                              | 2      |
| Leukaemia                                   | CML, CLL, AML, ALL, Polycythaemia vera                                                                                                  | 2      |
| Lymphoma, Multiple myeloma                  | Non-Hodgkin Lymphoma, Hodgkin Lymphoma, Waldenström                                                                                     | 2      |
| Moderate or severe liver disease            | Cirrhosis with portal hypertension with or without variceal bleeding                                                                    | 3      |
| 2nd Metastatic solid tumour                 |                                                                                                                                         | 6      |
| AIDS                                        |                                                                                                                                         | 6      |
| Age                                         | $<50$                                                                                                                                   | 0      |
|                                             | 50-59                                                                                                                                   | 1      |
|                                             | 60-69                                                                                                                                   | 2      |
|                                             | 70-79                                                                                                                                   | 3      |
|                                             | 80-89                                                                                                                                   | 4      |
|                                             | 90-99                                                                                                                                   | 5      |

To calculate the total Charlson comorbidity score, the comorbidity points and the age points were added up.

**Abbreviations:** AIDS, acquired immune deficiency syndrome; AML; acute myeloid leukaemia; ALL, acute leukemic leukaemia; cm, centimetre; CML, chronic myeloid leukaemia; CLL, chronic leukemic leukaemia; mg/dl, milligram per decilitre

**Supplementary Table 3: Patient-specific factors associated with all cause in-hospital mortality**

| Parameters (n=244)                       | Univariable analysis Odds Ratio (95%CI), p-value | Multivariable analysis Odds Ratio (95%CI), p-value |
|------------------------------------------|--------------------------------------------------|----------------------------------------------------|
| Age                                      | 1.01 (1.00-1.03), p=0.141                        | 1.02 (1.00-1.04), p= 0.109                         |
| Male gender                              | 1.61 (0.88-2.96), p=0.124                        |                                                    |
| BMI <sup>1)</sup>                        | 0.99 (0.93-1.04), p=0.621                        |                                                    |
| Charlson comorbidity index               | 1.13 (1.02-1.25), p= 0.017                       |                                                    |
| Congestive heart failure                 | 1.83 (0.87-3.87), p=0.111                        |                                                    |
| COPD                                     | 0.73 (0.28-1.92), p=0.525                        |                                                    |
| Cerebrovascular disease                  | 1.15 (0.58-2.29), p=0.687                        |                                                    |
| Moderate or severe liver disease         | 2.03 (0.76-5.36), p=0.156                        |                                                    |
| Moderate or severe renal disease         | 1.53 (0.77-3.06), p=0.225                        |                                                    |
| Solid tumour                             | 0.65 (0.29-1.45), p=0.290                        |                                                    |
| Immunosuppression                        | 1.36 (0.73-2.52), p=0.332                        |                                                    |
| Leukemia, Lymphoma and Multiple Myeloma  | 2.40 (1.19-4.84), p=0.015                        |                                                    |
| Hb on admission (g/l)                    | 0.98 (0.97-0.99), p=0.002                        | 0.98 (0.97-1.00), p= 0.027                         |
| Albumin (g/l) on admission <sup>1)</sup> | 0.93 (0.88-0.97), p=0.003                        | 0.93 (0.88-0.98), p= 0.011                         |
| Urea (mmol/l) on admission <sup>1)</sup> | 1.01 (0.97-1.05), p=0.640                        |                                                    |

Reasons for non-inclusion of parameters into multivariable analysis were: Charlson-comorbidity index = correlation with age; Leukaemia = correlation with Hb.

Solid tumour includes metastatic and non-metastatic tumour diseases. Immunosuppression includes human immunodeficiency virus (HIV), acquired immunodeficiency syndrome (AIDS) and immunosuppression due to medication.

1) Variables with missing values: BMI n=233 (11/244), Albumin n= 155 (89/244), Urea n=204 (40/244)

**Abbreviations:** BMI, body mass index; CI, confidence interval; COPD, chronic obstructive pulmonary disease; g/l, gram per litre; Hb; Hemoglobin; mmol/l, millimole per litre; n, number; nvHAP, non-ventilator associated pneumonia.

**Supplementary Table 4: Patient-specific factors associated with ICU-admission causal to nvHAP**

| Parameters (n=163)                       | Univariable analysis Odds Ratio (95% CI), p-value | Multivariable analysis Odds Ratio (95% CI), p-value |
|------------------------------------------|---------------------------------------------------|-----------------------------------------------------|
| Age                                      | 0.99 (0.98-1.01), p= 0.566                        | 1.00 (0.98-1.02), p= 0.883                          |
| Male gender                              | 1.11 (0.56-2.20), p= 0.770                        |                                                     |
| BMI <sup>1)</sup>                        | 1.02 (0.96-1.08), p= 0.569                        |                                                     |
| Charlson comorbidity index               | 1.01 (0.90-1.13), p= 0.852                        |                                                     |
| Congestive heart failure                 | 0.78 (0.27-2.23), p= 0.645                        |                                                     |
| COPD                                     | 0.64 (0.21-1.94), p= 0.431                        |                                                     |
| Cerebrovascular disease                  | 1.45 (0.63-3.33), p= 0.376                        |                                                     |
| Moderate or severe liver disease         | 2.09 (0.69-6.34), p= 0.192                        |                                                     |
| Moderate or severe renal disease         | 5.59 (2.20-14.18), p= 0.000                       | 3.17 (1.12-8.97), p= 0.092                          |
| Solid tumour                             | 0.46 (0.18-1.15), p= 0.097                        | 0.70 (0.24-2.08), p= 0.522                          |
| Immunosuppression                        | 0.63 (0.31-1.28), p= 0.200                        |                                                     |
| Leukemia, Lymphoma and Multiple Myeloma  | 1.27 (0.58-2.79), p= 0.557                        |                                                     |
| Hb (g/l) on admission                    | 0.98 (0.97-0.99), p= 0.001                        | 0.98 (0.97-1.00), p= 0.009                          |
| Albumin (g/l) on admission <sup>1)</sup> | 0.88 (0.83-0.94), p= 0.000                        |                                                     |
| Urea (mmol/l) on admission <sup>1)</sup> | 1.06 (1.00-1.12), p= 0.035                        | 1.03 (0.97-1.10), p= 0.265                          |

Patient collective consisting of all patients acquiring nvHAP outside ICU, with Status "ICU Yes" and who were not transferred to ICU within 5d after nvHAP due to other reason.

Reason for non-inclusion of parameters into multivariable analysis were: Albumin = correlation with hemoglobin

Solid tumour includes metastatic and non-metastatic tumour diseases. Immunosuppression includes human immunodeficiency virus (HIV), acquired immunodeficiency syndrome (AIDS) and immunosuppression due to medication.

1) Variables with missing values: BMI n= 154 (9/163) Albumin n=100 (63/163), Urea n=138 (25/163)

**Abbreviations:** BMI, body mass index; CI, confidence interval; COPD, chronic obstructive pulmonary disease; g/l, gram per litre; Hb; Hemoglobin; mmol/l, millimole per litre; n, number; nvHAP, non-ventilator associated pneumonia.

**Supplementary Table 5: Pneumonia-specific factors associated with ICU admission due to nvHAP**

| Parameters (n=163)                                                                             | Univariable analysis Odds Ratio (95% CI), p-value | Multivariable analysis Odds Ratio (95% CI), p-value |
|------------------------------------------------------------------------------------------------|---------------------------------------------------|-----------------------------------------------------|
| Bacterial pneumonia (bacterial pathogen in respiratory sample or BC, except oral flora or CNS) | 3.97 (1.92-8.18), p= 0.000                        |                                                     |
| Viral pneumonia                                                                                | 3.13 (0.75-13.01), p= 0.116                       |                                                     |
| Fungal pneumonia                                                                               | 0.80 (0.26-2.51), p= 0.704                        |                                                     |
| Infection with MDRO                                                                            | 2.57 (0.59-11.14), p= 0.208                       |                                                     |
| Colonisation with MDRO                                                                         | 3.72 (0.92-14.94), p= 0.064                       |                                                     |
| Bilateral infiltrate                                                                           | 2.66 (1.40-5.07), p= 0.003                        | 2.12 (1.01-4.45), p= 0.047                          |
| Sepsis                                                                                         | 11.62 (5.31-25.41), p= 0.000                      | 10.65 (4.82-23.52), p= 0.000                        |
| Empyema                                                                                        | 0.66 (0.48-0.90), p= 0.010                        |                                                     |
| ARDS                                                                                           | 0.60 (0.43-0.83), p= 0.002                        |                                                     |
| CRP peak (mg/l)                                                                                | 1.00 (1.00-1.00), p= 0.145                        |                                                     |

Reason for non-inclusion of parameters into multivariable analysis were: Bacterial pneumonia = correlation with sepsis; Empyema and ARDS as they could not be analyzed in the multivariable model, as there were no patients without an ICU admission.

**Abbreviations:** ARDS, acute respiratory distress syndrome; BC, blood culture; BMI, body mass index; CI, confidence interval; CNS, coagulase-negative staphylococci; CRP, C-reactive protein; MDRO, multi-drug resistant organism; mg/l, milligram per litre; n, number; nvHAP, non-ventilator associated pneumonia.

**Supplementary Table 6: Patient-specific factors associated with necessity of intubation causal to nvHAP**

| Parameters (n=209)                       | Univariable analysis Odds Ratio (95% CI), p-value | Multivariable analysis Odds Ratio (95% CI), p-value |
|------------------------------------------|---------------------------------------------------|-----------------------------------------------------|
| Age                                      | 0.99 (0.97-1.01), p= 0.213                        | 0.97 (0.95-1.00), p= 0.039                          |
| Male gender                              | 1.13 (0.59-2.17), p= 0.706                        |                                                     |
| BMI <sup>1)</sup>                        | 1.03 (0.97-1.09), p= 0.401                        |                                                     |
| Charlson comorbidity index               | 0.94 (0.84-1.06), p= 0.326                        |                                                     |
| Congestive heart failure                 | 0.71 (0.27-1.87), p= 0.493                        |                                                     |
| COPD                                     | 1.05 (0.39-2.84), p= 0.929                        |                                                     |
| Cerebrovascular disease                  | 0.63 (0.26-1.54), p= 0.311                        |                                                     |
| Moderate or severe liver disease         | 1.34 (0.48-3.75), p= 0.581                        |                                                     |
| Moderate or severe renal disease         | 3.19 (1.55-6.57), p= 0.002                        | 2.11 (0.82-5.46), p= 0.122                          |
| Solid tumour                             | 0.58 (0.23-1.50), p= 0.262                        |                                                     |
| Immunosuppression                        | 0.65 (0.31-1.37), p= 0.259                        |                                                     |
| Leukemia, Lymphoma and Multiple Myeloma  | 1.10 (0.49-2.48), p= 0.813                        |                                                     |
| Hb (g/l) on admission                    | 0.99 (0.98-1.01), p= 0.290                        |                                                     |
| Albumin (g/l) on admission <sup>1)</sup> | 0.93 (0.88-0.98), p= 0.008                        | 0.95 (0.90-1.00), p= 0.046                          |
| Urea (mmol/l) on admission <sup>1)</sup> | 1.00 (0.95-1.05), p= 0.981                        |                                                     |

Patient collective consisting of all patients with status "ICU yes", also including patients who acquired nvHAP on ICU and patients who were transferred on ICU due to other reasons. Solid tumour includes metastatic and non-metastatic tumour diseases. Immunosuppression includes human immunodeficiency virus (HIV), acquired immunodeficiency syndrome (AIDS) and immunosuppression due to medication.

1) Variables with missing values: BMI n=200 (9/209), Albumin n=129 (80/209), Urea n=177 (32/209).

**Abbreviations:** COPD, chronic obstructive pulmonary disease; BMI, body mass index; CI, confidence interval; g/l, gram per litre; mmol/l, millimole per litre; n, number; nvHAP, non-ventilator associated pneumonia.

### Supplementary Table 7: Pneumonia-specific factors associated with necessity for intubation causal to nvHAP

| Parameters (n=209)                                                                             | Univariable analysis Odds Ratio (95% CI), p-value | Multivariable analysis Odds Ratio (95% CI), p-value |
|------------------------------------------------------------------------------------------------|---------------------------------------------------|-----------------------------------------------------|
| Bacterial pneumonia (bacterial pathogen in respiratory sample or BC, except oral flora or CNS) | 2.11 (1.13-3.95), p= 0.020                        | 1.51 (0.72-3.17), p= 0.280                          |
| Viral pneumonia                                                                                | 4.24 (1.15-15.62), p= 0.030                       | 2.44 (0.52-11.48), p= 0.259                         |
| Fungal pneumonia                                                                               | 0.69 (0.19-2.58), p= 0.586                        |                                                     |
| Infection with MDRO                                                                            | 1.69 (0.53-5.38), p= 0.378                        |                                                     |
| Colonisation with MDRO                                                                         | 1.94 (0.70-5.35), p= 0.203                        |                                                     |
| Bilateral infiltrate                                                                           | 2.25 (1.21-4.17), p= 0.010                        | 1.74 (0.85-3.53), p= 0.128                          |
| Sepsis                                                                                         | 10.59 (5.27-21.31), p= 0.000                      | 8.73 (4.24-17.97), p= 0.000                         |
| Empyema                                                                                        | 0.37 (0.27-0.50), p= 0.000                        |                                                     |
| ARDS                                                                                           | 0.31 (0.22-0.43), p= 0.000                        |                                                     |
| CRP peak (mg/l)                                                                                | 1.00 (1.00-1.00), p= 0.115                        |                                                     |

Reasons for non-inclusion of parameters into multivariable analysis were: ARDS and Empyema as they could not be analyzed in the multivariable model, as there were no patients without intubation.

**Abbreviations:** ARDS, acute respiratory distress syndrome; BC, blood culture; BMI, body mass index; CI, confidence interval; CNS, coagulase-negative staphylococci; CRP, C-reactive protein; MDRO, multi-drug resistant organism; mg/l, milligram per litre; n, number; nvHAP, non-ventilator associated pneumonia.

## References

1. De Pauw, B.; Walsh, T.J.; Donnelly, J.P.; Stevens, D.A.; Edwards, J.E.; Calandra, T.; Pappas, P.G.; Maertens, J.; Lortholary, O.; Kauffman, C.A.; et al. Revised definitions of invasive fungal disease from the European Organization for Research and Treatment of Cancer/Invasive Fungal Infections Cooperative Group and the National Institute of Allergy and Infectious Diseases Mycoses Study Group (EORTC/MSG) Consensus Group. *Clinical infectious diseases : an official publication of the Infectious Diseases Society of America* **2008**, *46*, 1813-1821, doi:10.1086/588660.
2. Wolfensberger, A.; Jakob, W.; Faes Hesse, M.; Kuster, S.P.; Meier, A.H.; Schreiber, P.W.; Clack, L.; Sax, H. Development and validation of a semi-automated surveillance system-lowering the fruit for non-ventilator-associated hospital-acquired pneumonia (nvHAP) prevention. *Clinical microbiology and infection : the official publication of the European Society of Clinical Microbiology and Infectious Diseases* **2019**, *25*, 1428.e1427-1428.e1413, doi:10.1016/j.cmi.2019.03.019.
3. Marik, P.E.; Taeb, A.M. SIRS, qSOFA and new sepsis definition. *Journal of thoracic disease* **2017**, *9*, 943-945, doi:10.21037/jtd.2017.03.125.
4. Extermann, M. Measuring comorbidity in older cancer patients. *European journal of cancer (Oxford, England : 1990)* **2000**, *36*, 453-471, doi:10.1016/s0959-8049(99)00319-6.
5. Sundararajan, V.; Henderson, T.; Perry, C.; Muggivan, A.; Quan, H.; Ghali, W.A. New ICD-10 version of the Charlson comorbidity index predicted in-hospital mortality. *Journal of clinical epidemiology* **2004**, *57*, 1288-1294, doi:10.1016/j.jclinepi.2004.03.012.
6. Charlson, M.E.; Pompei, P.; Ales, K.L.; MacKenzie, C.R. A new method of classifying prognostic comorbidity in longitudinal studies: development and validation. *Journal of chronic diseases* **1987**, *40*, 373-383, doi:10.1016/0021-9681(87)90171-8.
